# Supplementary material for: The critical role of Hedgehog-responsive mesenchymal progenitors in meniscus development and injury repair
Source: eLife. 2021 Jun 4;10:e62917. doi: 10.7554/eLife.62917 (PMC8177886; doi:10.7554/eLife.62917)
Supplement: Figure 2—source data 1. [file elife-62917-fig2-data1.xlsx]

## Sheet: Sheet1
Fig. 2B	Sca1				Fig. 2B	Cd90				Fig. 2B	Cd200				Fig. 2B	PDGFRα
Gli1-	40.19	34.68	44.61		Gli1-	13.55	7.65	19.27		Gli1-	34.11	42.66	21.37		Gli1-	22.9	32.37	18.77
Gli1+	59.81	65.32	55.39		Gli1+	86.45	92.35	80.73		Gli1+	65.89	57.34	78.63		Gli1+	77.1	67.63	81.23
Table Analyzed	Figure 2B Sca1				Table Analyzed	Figure 2B (Cd90)				Table Analyzed	Figure 2B (Cd200)				Table Analyzed	Figure 2B (PDGFRα)
Column B	Gli1+				Column B	Gli1+				Column B	Gli1+				Column B	Gli1+
vs.	vs.				vs.	vs.				vs.	vs.				vs.	vs.
Column A	Gli1-				Column A	Gli1-				Column A	Gli1-				Column A	Gli1-
Unpaired t test					Unpaired t test with Welch's correction					Unpaired t test with Welch's correction					Unpaired t test with Welch's correction
P value	0.0074				P value	0.0001				P value	0.0168				P value	0.0009
P value summary	**				P value summary	***				P value summary	*				P value summary	***
Significantly different (P < 0.05)?	Yes				Significantly different (P < 0.05)?	Yes				Significantly different (P < 0.05)?	Yes				Significantly different (P < 0.05)?	Yes
One- or two-tailed P value?	Two-tailed				One- or two-tailed P value?	Two-tailed				One- or two-tailed P value?	Two-tailed				One- or two-tailed P value?	Two-tailed
t, df	t=5.009, df=4				Welch-corrected t, df	t=15.39, df=4.000				Welch-corrected t, df	t=3.952, df=4.000				Welch-corrected t, df	t=8.895, df=4.000
How big is the difference?					How big is the difference?					How big is the difference?					How big is the difference?
Mean of column A	39.83				Mean of column A	13.49				Mean of column A	32.71				Mean of column A	24.68
Mean of column B	60.17				Mean of column B	86.51				Mean of column B	67.29				Mean of column B	75.32
Difference between means (B - A) ± SEM	20.35 ± 4.062				Difference between means (B - A) ± SEM	73.02 ± 4.744				Difference between means (B - A) ± SEM	34.57 ± 8.748				Difference between means (B - A) ± SEM	50.64 ± 5.693
95% confidence interval	9.069 to 31.62				95% confidence interval	59.85 to 86.19				95% confidence interval	10.29 to 58.86				95% confidence interval	34.83 to 66.45
R squared (eta squared)	0.8625				R squared (eta squared)	0.9834				R squared (eta squared)	0.7961				R squared (eta squared)	0.9519
F test to compare variances					F test to compare variances					F test to compare variances					F test to compare variances
F, DFn, Dfd	1.000, 2, 2				F, DFn, Dfd	1.000, 2, 2				F, DFn, Dfd	1.000, 2, 2				F, DFn, Dfd	1.000, 2, 2
P value	>0.9999				P value	>0.9999				P value					P value	>0.9999
P value summary	ns				P value summary	ns				P value summary					P value summary	ns
Significantly different (P < 0.05)?	No				Significantly different (P < 0.05)?	No				Significantly different (P < 0.05)?	No				Significantly different (P < 0.05)?	No
Data analyzed					Data analyzed					Data analyzed					Data analyzed
Sample size, column A	3				Sample size, column A	3				Sample size, column A	3				Sample size, column A	3
Sample size, column B	3				Sample size, column B	3				Sample size, column B	3				Sample size, column B	3
Fig. 2C	CFU-Fs				Fig. 2E	Migration %				Fig. 2G	Pparg					Fig. 2G	Lpl					Fig. 2G	Ibsp
Gli1-	23	35	28		Gli1-	35.5	39.2	37.1		Gli1-	0.93	0.98	1.04	1		Gli1-	0.87	0.94	1.12	1		Gli1-	1	0.96	0.98	1.05
Gli1+	67	73.5	78		Gli1+	77.3	68.3	72.1		Gli1+	43.65	41.05	38.9	36.4		Gli1+	57.9	63.9	56.2	61.2		Gli1+	32.4	28.4	26.4	32.9
Table Analyzed	Fig. 2C CFU-Fs				Table Analyzed	Fig. 2E Migration %				Table Analyzed	Fig. 2G Pparg					Table Analyzed	Fig. 2G Lpl					Table Analyzed	Fig. 2G Ibsp
Column B	Gli1+				Column B	Gli1+				Column B	Gli1+					Column B	Gli1+					Column B	Gli1+
vs.	vs.				vs.	vs.				vs.	vs.					vs.	vs.					vs.	vs.
Column A	Gli1-				Column A	Gli1-				Column A	Gli1-					Column A	Gli1-					Column A	Gli1-
Unpaired t test with Welch's correction					Unpaired t test with Welch's correction					Unpaired t test with Welch's correction						Unpaired t test with Welch's correction						Unpaired t test with Welch's correction
P value	0.0008				P value	0.002				P value	0.0001					P value	<0.0001					P value	0.0003
P value summary	***				P value summary	**				P value summary	***					P value summary	****					P value summary	***
Significantly different (P < 0.05)?	Yes				Significantly different (P < 0.05)?	Yes				Significantly different (P < 0.05)?	Yes					Significantly different (P < 0.05)?	Yes					Significantly different (P < 0.05)?	Yes
One- or two-tailed P value?	Two-tailed				One- or two-tailed P value?	Two-tailed				One- or two-tailed P value?	Two-tailed					One- or two-tailed P value?	Two-tailed					One- or two-tailed P value?	Two-tailed
Welch-corrected t, df	t=9.352, df=3.971				Welch-corrected t, df	t=12.52, df=2.656				Welch-corrected t, df	t=25.27, df=3.001					Welch-corrected t, df	t=34.26, df=3.006					Welch-corrected t, df	t=18.45, df=3.001
How big is the difference?					How big is the difference?					How big is the difference?						How big is the difference?						How big is the difference?
Mean of column A	28.67				Mean of column A	37.27				Mean of column A	0.9875					Mean of column A	0.9825					Mean of column A	0.9975
Mean of column B	72.83				Mean of column B	72.57				Mean of column B	40					Mean of column B	59.8					Mean of column B	30.03
Difference between means (B - A) ± SEM	44.17 ± 4.723				Difference between means (B - A) ± SEM	35.30 ± 2.820				Difference between means (B - A) ± SEM	39.01 ± 1.544					Difference between means (B - A) ± SEM	58.82 ± 1.717					Difference between means (B - A) ± SEM	29.03 ± 1.573
95% confidence interval	31.02 to 57.32				95% confidence interval	25.63 to 44.97				95% confidence interval	34.10 to 43.92					95% confidence interval	53.36 to 64.28					95% confidence interval	24.02 to 34.03
R squared (eta squared)	0.9566				R squared (eta squared)	0.9833				R squared (eta squared)	0.9953					R squared (eta squared)	0.9974					R squared (eta squared)	0.9913
F test to compare variances					F test to compare variances					F test to compare variances						F test to compare variances						F test to compare variances
F, DFn, Dfd	1.188, 2, 2				F, DFn, Dfd	5.928, 2, 2				F, DFn, Dfd	4557, 3, 3					F, DFn, Dfd	1049, 3, 3					F, DFn, Dfd	6634, 3, 3
P value	0.9141				P value	0.2887				P value	<0.0001					P value	<0.0001					P value	<0.0001
P value summary	ns				P value summary	ns				P value summary	****					P value summary	****					P value summary	****
Significantly different (P < 0.05)?	No				Significantly different (P < 0.05)?	No				Significantly different (P < 0.05)?	Yes					Significantly different (P < 0.05)?	Yes					Significantly different (P < 0.05)?	Yes
Data analyzed					Data analyzed					Data analyzed						Data analyzed						Data analyzed
Sample size, column A	3				Sample size, column A	3				Sample size, column A	4					Sample size, column A	4					Sample size, column A	4
Sample size, column B	3				Sample size, column B	3				Sample size, column B	4					Sample size, column B	4					Sample size, column B	4
Fig. 2G	Osx					Fig. 2G	Col2a1					Fig. 2G	Sox9
Gli1-	0.98	0.94	1	0.93		Gli1-	0.95	1	1.03	1.1		Gli1-	0.94	1.16	0.92	1
Gli1+	4.04	3.75	3.31	4.72		Gli1+	4.4	4.1	5.8	6.4		Gli1+	8.5	12.7	12.1	9.2
Table Analyzed	Fig. 2G Osx					Table Analyzed	Fig. 2G Col2a1					Table Analyzed	Fig. 2G Sox9
Column B	Gli1+					Column B	Gli1+					Column B	Gli1+
vs.	vs.					vs.	vs.					vs.	vs.
Column A	Gli1-					Column A	Gli1-					Column A	Gli1-
Unpaired t test with Welch's correction						Unpaired t test with Welch's correction						Unpaired t test with Welch's correction
P value	0.002					P value	0.0048					P value	0.0026
P value summary	**					P value summary	**					P value summary	**
Significantly different (P < 0.05)?	Yes					Significantly different (P < 0.05)?	Yes					Significantly different (P < 0.05)?	Yes
One- or two-tailed P value?	Two-tailed					One- or two-tailed P value?	Two-tailed					One- or two-tailed P value?	Two-tailed
Welch-corrected t, df	t=10.10, df=3.019					Welch-corrected t, df	t=7.524, df=3.019					Welch-corrected t, df	t=9.220, df=3.016
How big is the difference?						How big is the difference?						How big is the difference?
Mean of column A	0.9625					Mean of column A	1.02					Mean of column A	1.005
Mean of column B	3.955					Mean of column B	5.175					Mean of column B	10.63
Difference between means (B - A) ± SEM	2.993 ± 0.2963					Difference between means (B - A) ± SEM	4.155 ± 0.5522					Difference between means (B - A) ± SEM	9.620 ± 1.043
95% confidence interval	2.053 to 3.932					95% confidence interval	2.404 to 5.906					95% confidence interval	6.310 to 12.93
R squared (eta squared)	0.9712					R squared (eta squared)	0.9494					R squared (eta squared)	0.9657
F test to compare variances						F test to compare variances						F test to compare variances
F, DFn, Dfd	320.8, 3, 3					F, DFn, Dfd	309.1, 3, 3					F, DFn, Dfd	367.0, 3, 3
P value	0.0006					P value	0.0006					P value	0.0005
P value summary	***					P value summary	***					P value summary	***
Significantly different (P < 0.05)?	Yes					Significantly different (P < 0.05)?	Yes					Significantly different (P < 0.05)?	Yes
Data analyzed						Data analyzed						Data analyzed
Sample size, column A	4					Sample size, column A	4					Sample size, column A	4
Sample size, column B	4					Sample size, column B	4					Sample size, column B	4
