# Supplementary material for: The critical role of Hedgehog-responsive mesenchymal progenitors in meniscus development and injury repair
Source: eLife. 2021 Jun 4;10:e62917. doi: 10.7554/eLife.62917 (PMC8177886; doi:10.7554/eLife.62917)
Supplement: Figure 3—source data 1. [file elife-62917-fig3-data1.xlsx]

## Sheet: Sheet1
Fig. 3A										Fig. 3B	Day 2
Veh	1	0.98	0.97							Veh	6.5	8	7.25	7	7.5	8
GANT-61	0.24	0.21	0.29							GANT-61	4.5	5.3	4.8
PMA	2.3	1.8	2.8							PMA	8.5	9	11.8
Number of families	1									Number of families	1
Number of comparisons per family	2									Number of comparisons per family	2
Alpha	0.05									Alpha	0.05
Dunnett's multiple comparisons test	Mean Diff.	95.00% CI of diff.	Significant?	Summary	Adjusted P Value	A-?				Dunnett's multiple comparisons test	Mean Diff.	95.00% CI of diff.	Significant?	Summary	Adjusted P Value	A-?
Veh vs. GANT-61	0.7367	0.05932 to 1.414	Yes	*	0.0364	B	GANT-61			Veh vs. GANT-61	2.508	0.7087 to 4.308	Yes	**	0.0097	B	GANT-61
Veh vs. PMA	-1.317	-1.994 to -0.6393	Yes	**	0.0026	C	PMA			Veh vs. PMA	-2.392	-4.191 to -0.5920	Yes	*	0.0126	C	PMA
Test details	Mean 1	Mean 2	Mean Diff.	SE of diff.	n1	n2	q	DF		Test details	Mean 1	Mean 2	Mean Diff.	SE of diff.	n1	n2	q	DF
Veh vs. GANT-61	0.9833	0.2467	0.7367	0.2366	3	3	3.114	6		Veh vs. GANT-61	7.375	4.867	2.508	0.682	6	3	3.678	9
Veh vs. PMA	0.9833	2.3	-1.317	0.2366	3	3	5.565	6		Veh vs. PMA	7.375	9.767	-2.392	0.682	6	3	3.507	9
Fig. 3B	Day 4									Fig. 3B	Day 6
Veh	11.25	13.5	14.5	13.5	15	13.75				Veh	27.5	33	28	29.75	31.25	27
GANT-61	6.5	8.3	9							GANT-61	11.5	10.8	13
PMA	22.5	28	27.8							PMA	53.5	58	43.5
Number of families	1									Number of families	1
Number of comparisons per family	2									Number of comparisons per family	2
Alpha	0.05									Alpha	0.05
Dunnett's multiple comparisons test	Mean Diff.	95.00% CI of diff.	Significant?	Summary	Adjusted P Value	A-?				Dunnett's multiple comparisons test	Mean Diff.	95.00% CI of diff.	Significant?	Summary	Adjusted P Value	A-?
Veh vs. GANT-61	5.65	2.180 to 9.120	Yes	**	0.0038	B	GANT-61			Veh vs. GANT-61	17.65	10.28 to 25.02	Yes	***	0.0003	B	GANT-61
Veh vs. PMA	-12.52	-15.99 to -9.047	Yes	****	<0.0001	C	PMA			Veh vs. PMA	-22.25	-29.62 to -14.88	Yes	****	<0.0001	C	PMA
Test details	Mean 1	Mean 2	Mean Diff.	SE of diff.	n1	n2	q	DF		Test details	Mean 1	Mean 2	Mean Diff.	SE of diff.	n1	n2	q	DF
Veh vs. GANT-61	13.58	7.933	5.65	1.315	6	3	4.297	9		Veh vs. GANT-61	29.42	11.77	17.65	2.794	6	3	6.317	9
Veh vs. PMA	13.58	26.1	-12.52	1.315	6	3	9.519	9		Veh vs. PMA	29.42	51.67	-22.25	2.794	6	3	7.963	9
Fig. 3B	Day 8									Fig. 3D
Veh	57.5	68.25	53.5	58.5	45.5	53.75				Veh	0.469	0.475	0.487	0.528	0.566	0.537
GANT-61	15.5	21	17.8							GANT-61	0.402	0.396	0.381
PMA	88.5	92.3	98.5							PMA	0.864	0.878	0.856
Number of families	1									Number of families	1
Number of comparisons per family	2									Number of comparisons per family	2
Alpha	0.05									Alpha	0.05
Dunnett's multiple comparisons test	Mean Diff.	95.00% CI of diff.	Significant?	Summary	Adjusted P Value	A-?				Dunnett's multiple comparisons test	Mean Diff.	95.00% CI of diff.	Significant?	Summary	Adjusted P Value	A-?
Veh vs. GANT-61	38.07	26.49 to 49.64	Yes	****	<0.0001	B	GANT-61			Veh vs. GANT-61	0.1173	0.06134 to 0.1733	Yes	***	0.0007	B	GANT-61
Veh vs. PMA	-36.93	-48.51 to -25.36	Yes	****	<0.0001	C	PMA			Veh vs. PMA	-0.3557	-0.4117 to -0.2997	Yes	****	<0.0001	C	PMA
Test details	Mean 1	Mean 2	Mean Diff.	SE of diff.	n1	n2	q	DF		Test details	Mean 1	Mean 2	Mean Diff.	SE of diff.	n1	n2	q	DF
Veh vs. GANT-61	56.17	18.1	38.07	4.385	6	3	8.68	9		Veh vs. GANT-61	0.5103	0.393	0.1173	0.02122	6	3	5.529	9
Veh vs. PMA	56.17	93.1	-36.93	4.385	6	3	8.422	9		Veh vs. PMA	0.5103	0.866	-0.3557	0.02122	6	3	16.76	9
