# Supplementary material for: The critical role of Hedgehog-responsive mesenchymal progenitors in meniscus development and injury repair
Source: eLife. 2021 Jun 4;10:e62917. doi: 10.7554/eLife.62917 (PMC8177886; doi:10.7554/eLife.62917)
Supplement: Figure 4—source data 1. [file elife-62917-fig4-data1.xlsx]

## Sheet: Sheet1
Fig. 4D										Fig. 4E	MS							Fig. 4E	ML							Fig. 4F	MS							Fig. 4F	MS
Sham	6	6	6	6	6	6	6	6		Sham	4500	4800	3900	4100	4300	4500		Sham	4300	3500	4700	4100	3400	2900		Sham	15.3	14.7	20.1	19.3	21.4	15.6		Sham	14.81	13.55	12.23	20.82	18.77	19.63
1	2	1	1	2	0	1	0	1		Injury	5300	4500	5900	6700	4800			Injury	6100	5800	7200	7900	7400			Injury	25.3	28.6	33.5	27.7	31.2			Injury	67.3	72.1	61.8	59.4	66.4
2	1	0	0	2	1	1	2	2
4	2	2	2	3	3	1	2	2		Table Analyzed	Fig. 4E MS							Table Analyzed	Fig. 4E ML							Table Analyzed	Fig. 4F MS							Table Analyzed	Fig. 4F ML
8	3	3	3	4	2	2	4	1
12	5	4	4	5	3	4	3	3		Column B	Injury							Column B	Injury							Column B	Injury							Column B	Injury
										vs.	vs.							vs.	vs.							vs.	vs.							vs.	vs.
Number of families	1									Column A	Sham							Column A	Sham							Column A	Sham							Column A	Sham
Number of comparisons per family	5
Alpha	0.05									Unpaired t test with Welch's correction								Unpaired t test with Welch's correction								Unpaired t test with Welch's correction								Unpaired t test with Welch's correction
										P value	0.0481							P value	0.0003							P value	0.0002							P value	<0.0001
Dunnett's multiple comparisons test	Mean Diff.	95.00% CI of diff.	Significant?	Summary	Adjusted P Value	A-?				P value summary	*							P value summary	***							P value summary	***							P value summary	****
Sham vs. 1	5	4.009 to 5.991	Yes	****	<0.0001	B	1			Significantly different (P < 0.05)?	Yes							Significantly different (P < 0.05)?	Yes							Significantly different (P < 0.05)?	Yes							Significantly different (P < 0.05)?	Yes
Sham vs. 2	4.875	3.884 to 5.866	Yes	****	<0.0001	C	2			One- or two-tailed P value?	Two-tailed							One- or two-tailed P value?	Two-tailed							One- or two-tailed P value?	Two-tailed							One- or two-tailed P value?	Two-tailed
Sham vs. 4	3.875	2.884 to 4.866	Yes	****	<0.0001	D	4			Welch-corrected t, df	t=2.622, df=4.884							Welch-corrected t, df	t=6.346, df=7.302							Welch-corrected t, df	t=6.263, df=8.245							Welch-corrected t, df	t=18.39, df=7.117
Sham vs. 8	3.25	2.259 to 4.241	Yes	****	<0.0001	E	8
Sham vs. 12	2.125	1.134 to 3.116	Yes	****	<0.0001	F	12			How big is the difference?								How big is the difference?								How big is the difference?								How big is the difference?
										Mean of column A	4350							Mean of column A	3817							Mean of column A	17.73							Mean of column A	16.64
Test details	Mean 1	Mean 2	Mean Diff.	SE of diff.	n1	n2	q	DF		Mean of column B	5440							Mean of column B	6880							Mean of column B	29.26							Mean of column B	65.4
Sham vs. 1	6	1	5	0.3789	8	8	13.19	42		Difference between means (B - A) ± SEM	1090 ± 415.7							Difference between means (B - A) ± SEM	3063 ± 482.7							Difference between means (B - A) ± SEM	11.53 ± 1.840							Difference between means (B - A) ± SEM	48.77 ± 2.652
Sham vs. 2	6	1.125	4.875	0.3789	8	8	12.86	42		95% confidence interval	13.84 to 2166							95% confidence interval	1931 to 4195							95% confidence interval	7.305 to 15.75							95% confidence interval	42.52 to 55.01
Sham vs. 4	6	2.125	3.875	0.3789	8	8	10.23	42		R squared (eta squared)	0.5847							R squared (eta squared)	0.8465							R squared (eta squared)	0.8263							R squared (eta squared)	0.9794
Sham vs. 8	6	2.75	3.25	0.3789	8	8	8.576	42
Sham vs. 12	6	3.875	2.125	0.3789	8	8	5.608	42		F test to compare variances								F test to compare variances								F test to compare variances								F test to compare variances
										F, DFn, Dfd	7.553, 4, 5							F, DFn, Dfd	1.805, 4, 5							F, DFn, Dfd	1.223, 4, 5							F, DFn, Dfd	1.944, 4, 5
										P value	0.0478							P value	0.5307							P value	0.8123							P value	0.4831
										P value summary	*							P value summary	ns							P value summary	ns							P value summary	ns
										Significantly different (P < 0.05)?	Yes							Significantly different (P < 0.05)?	No							Significantly different (P < 0.05)?	No							Significantly different (P < 0.05)?	No
										Data analyzed								Data analyzed								Data analyzed								Data analyzed
										Sample size, column A	6							Sample size, column A	6							Sample size, column A	6							Sample size, column A	6
										Sample size, column B	5							Sample size, column B	5							Sample size, column B	5							Sample size, column B	5
Fig. 4G	Ihh									Fig. 4G	Dhh									Fig. 4G	Ptch1									Fig. 4G	Smo
Sham	1.7	1.06	0.56	1						Sham	0.95	0.73	0.79	1.82						Sham	1.6	1.17	0.61	0.87						Sham	2.69	1.7	0.37	0.6
1W	0.71	0.83	0.37	0.51						1W	7.94	8.57	3.63	4.72						1W	15.3	17.69	7.54	7.19						1W	60.03	63.89	27.43	23.88
2W	1.97	2.6	0.76	0.65						2W	9	10.27	3.89	3.39						2W	39.26	45.73	13.32	11.35						2W	98.87	101.65	30.64	26.86
Number of families	1									Number of families	1									Number of families	1									Number of families	1
Number of comparisons per family	3									Number of comparisons per family	3									Number of comparisons per family	3									Number of comparisons per family	3
Alpha	0.05									Alpha	0.05									Alpha	0.05									Alpha	0.05
Tukey's multiple comparisons test	Mean Diff.	95.00% CI of diff.	Significant?	Summary	Adjusted P Value					Tukey's multiple comparisons test	Mean Diff.	95.00% CI of diff.	Significant?	Summary	Adjusted P Value					Tukey's multiple comparisons test	Mean Diff.	95.00% CI of diff.	Significant?	Summary	Adjusted P Value					Tukey's multiple comparisons test	Mean Diff.	95.00% CI of diff.	Significant?	Summary	Adjusted P Value
Sham vs. 1W	0.475	-0.7541 to 1.704	No	ns	0.5496	A-B				Sham vs. 1W	-5.143	-10.03 to -0.2584	Yes	*	0.0397	A-B				Sham vs. 1W	-10.87	-31.88 to 10.14	No	ns	0.3605	A-B				Sham vs. 1W	-42.47	-95.36 to 10.42	No	ns	0.117	A-B
Sham vs. 2W	-0.415	-1.644 to 0.8141	No	ns	0.6287	A-C				Sham vs. 2W	-5.565	-10.45 to -0.6809	Yes	*	0.0273	A-C				Sham vs. 2W	-26.35	-47.36 to -5.342	Yes	*	0.0166	A-C				Sham vs. 2W	-63.17	-116.1 to -10.27	Yes	*	0.0215	A-C
1W vs. 2W	-0.89	-2.119 to 0.3391	No	ns	0.1625	B-C				1W vs. 2W	-0.4225	-5.307 to 4.462	No	ns	0.9685	B-C				1W vs. 2W	-15.49	-36.50 to 5.525	No	ns	0.1541	B-C				1W vs. 2W	-20.7	-73.59 to 32.19	No	ns	0.5419	B-C
Test details	Mean 1	Mean 2	Mean Diff.	SE of diff.	n1	n2	q	DF		Test details	Mean 1	Mean 2	Mean Diff.	SE of diff.	n1	n2	q	DF		Test details	Mean 1	Mean 2	Mean Diff.	SE of diff.	n1	n2	q	DF		Test details	Mean 1	Mean 2	Mean Diff.	SE of diff.	n1	n2	q	DF
Sham vs. 1W	1.08	0.605	0.475	0.4402	4	4	1.526	9		Sham vs. 1W	1.073	6.215	-5.143	1.749	4	4	4.157	9		Sham vs. 1W	1.063	11.93	-10.87	7.525	4	4	2.042	9		Sham vs. 1W	1.34	43.81	-42.47	18.94	4	4	3.17	9
Sham vs. 2W	1.08	1.495	-0.415	0.4402	4	4	1.333	9		Sham vs. 2W	1.073	6.638	-5.565	1.749	4	4	4.499	9		Sham vs. 2W	1.063	27.42	-26.35	7.525	4	4	4.952	9		Sham vs. 2W	1.34	64.51	-63.17	18.94	4	4	4.715	9
1W vs. 2W	0.605	1.495	-0.89	0.4402	4	4	2.859	9		1W vs. 2W	6.215	6.638	-0.4225	1.749	4	4	0.3416	9		1W vs. 2W	11.93	27.42	-15.49	7.525	4	4	2.91	9		1W vs. 2W	43.81	64.51	-20.7	18.94	4	4	1.545	9
Fig. 4G	Gli1									Fig. 4G	Gli2									Fig. 4G	Gli3									Fig. 4G	Hhip
Sham	2.13	1.35	0.5	0.7						Sham	0.92	0.81	1.35							Sham	1.03	1.14	0.85							Sham	1.03	0.76	0.89	1.43
1W	6.09	9.9	2.84	3.67						1W	2.3	1.59	3.39							1W	1	0.93	2.06							1W	11.37	8.86	5.31	3.03
2W	30.86	28.2	9.76	7.45						2W	3.37	5.55	2.91							2W	1.38	1.35	1.15							2W	19.66	20.36	7	6.4
Number of families	1									Number of families	1									Number of families	1									Number of families	1
Number of comparisons per family	3									Number of comparisons per family	3									Number of comparisons per family	3									Number of comparisons per family	3
Alpha	0.05									Alpha	0.05									Alpha	0.05									Alpha	0.05
Tukey's multiple comparisons test	Mean Diff.	95.00% CI of diff.	Significant?	Summary	Adjusted P Value					Tukey's multiple comparisons test	Mean Diff.	95.00% CI of diff.	Significant?	Summary	Adjusted P Value					Tukey's multiple comparisons test	Mean Diff.	95.00% CI of diff.	Significant?	Summary	Adjusted P Value					Tukey's multiple comparisons test	Mean Diff.	95.00% CI of diff.	Significant?	Summary	Adjusted P Value
Sham vs. 1W	-4.455	-18.81 to 9.899	No	ns	0.6734	A-B				Sham vs. 1W	-1.4	-3.860 to 1.060	No	ns	0.2647	A-B				Sham vs. 1W	-0.3233	-1.281 to 0.6339	No	ns	0.5832	A-B				Sham vs. 1W	-6.115	-15.85 to 3.622	No	ns	0.2389	A-B
Sham vs. 2W	-17.9	-32.25 to -3.544	Yes	*	0.0172	A-C				Sham vs. 2W	-2.917	-5.377 to -0.4568	Yes	*	0.0253	A-C				Sham vs. 2W	-0.2867	-1.244 to 0.6705	No	ns	0.6493	A-C				Sham vs. 2W	-12.33	-22.06 to -2.590	Yes	*	0.0158	A-C
1W vs. 2W	-13.44	-27.80 to 0.9115	No	ns	0.0659	B-C				1W vs. 2W	-1.517	-3.977 to 0.9432	No	ns	0.2211	B-C				1W vs. 2W	0.03667	-0.9205 to 0.9939	No	ns	0.9924	B-C				1W vs. 2W	-6.213	-15.95 to 3.525	No	ns	0.2297	B-C
Test details	Mean 1	Mean 2	Mean Diff.	SE of diff.	n1	n2	q	DF		Test details	Mean 1	Mean 2	Mean Diff.	SE of diff.	n1	n2	q	DF		Test details	Mean 1	Mean 2	Mean Diff.	SE of diff.	n1	n2	q	DF		Test details	Mean 1	Mean 2	Mean Diff.	SE of diff.	n1	n2	q	DF
Sham vs. 1W	1.17	5.625	-4.455	5.141	4	4	1.225	9		Sham vs. 1W	1.027	2.427	-1.4	0.8017	3	3	2.47	6		Sham vs. 1W	1.007	1.33	-0.3233	0.312	3	3	1.466	6		Sham vs. 1W	1.028	7.143	-6.115	3.487	4	4	2.48	9
Sham vs. 2W	1.17	19.07	-17.9	5.141	4	4	4.923	9		Sham vs. 2W	1.027	3.943	-2.917	0.8017	3	3	5.145	6		Sham vs. 2W	1.007	1.293	-0.2867	0.312	3	3	1.3	6		Sham vs. 2W	1.028	13.36	-12.33	3.487	4	4	4.999	9
1W vs. 2W	5.625	19.07	-13.44	5.141	4	4	3.698	9		1W vs. 2W	2.427	3.943	-1.517	0.8017	3	3	2.675	6		1W vs. 2W	1.33	1.293	0.03667	0.312	3	3	0.1662	6		1W vs. 2W	7.143	13.36	-6.213	3.487	4	4	2.519	9
Fig. 4J						Fig. 4L
Ctrl	30.02	36.31	24.95	21.29		Ctrl	6	3	3	3	5
DTA	13.07	10.85	7.38	19.92		DTA	3	2	2	3	1
Table Analyzed	Fig. 4J					Table Analyzed	Fig. 4L
Column B	DTA					Column B	DTA
vs.	vs.					vs.	vs.
Column A	Ctrl					Column A	Ctrl
Unpaired t test with Welch's correction						Unpaired t test with Welch's correction
P value	0.0114					P value	0.0468
P value summary	*					P value summary	*
Significantly different (P < 0.05)?	Yes					Significantly different (P < 0.05)?	Yes
One- or two-tailed P value?	Two-tailed					One- or two-tailed P value?	Two-tailed
Welch-corrected t, df	t=3.655, df=5.757					Welch-corrected t, df	t=2.449, df=6.494
How big is the difference?						How big is the difference?
Mean of column A	28.14					Mean of column A	4
Mean of column B	12.81					Mean of column B	2.2
Difference between means (B - A) ± SEM	-15.34 ± 4.197					Difference between means (B - A) ± SEM	-1.800 ± 0.7348
95% confidence interval	-25.71 to -4.963					95% confidence interval	-3.565 to -0.03456
R squared (eta squared)	0.6988					R squared (eta squared)	0.4802
F test to compare variances						F test to compare variances
F, DFn, Dfd	1.517, 3, 3					F, DFn, Dfd	2.857, 4, 4
P value	0.7402					P value	0.3336
P value summary	ns					P value summary	ns
Significantly different (P < 0.05)?	No					Significantly different (P < 0.05)?	No
Data analyzed						Data analyzed
Sample size, column A	4					Sample size, column A	5
Sample size, column B	4					Sample size, column B	5
