# Supplementary material for: The critical role of Hedgehog-responsive mesenchymal progenitors in meniscus development and injury repair
Source: eLife. 2021 Jun 4;10:e62917. doi: 10.7554/eLife.62917 (PMC8177886; doi:10.7554/eLife.62917)
Supplement: Figure 5—source data 1. [file elife-62917-fig5-data1.xlsx]

## Sheet: Sheet1
Fig. 5C										Fig. 5G
Veh	1	2	1	3	3	1	1	2		Veh	4	3	2	2	1	1	1
Gli1-	3	2	1	2	1	1	2	3		PMA	6	5	6	6	4	4	3
Gli1+	5	5	4	5	4	4	5	6
										Table Analyzed	Fig. 5G
Number of families	1
Number of comparisons per family	3									Column B	PMA
Alpha	0.05									vs.	vs.
										Column A	Veh
Tukey's multiple comparisons test	Mean Diff.	95.00% CI of diff.	Significant?	Summary	Adjusted P Value
Veh vs. Gli1-	-0.125	-1.149 to 0.8994	No	ns	0.9493	A-B				Unpaired t test with Welch's correction
Veh vs. Gli1+	-3	-4.024 to -1.976	Yes	****	<0.0001	A-C				P value	0.0007
Gli1- vs. Gli1+	-2.875	-3.899 to -1.851	Yes	****	<0.0001	B-C				P value summary	***
										Significantly different (P < 0.05)?	Yes
Test details	Mean 1	Mean 2	Mean Diff.	SE of diff.	n1	n2	q	DF		One- or two-tailed P value?	Two-tailed
Veh vs. Gli1-	1.75	1.875	-0.125	0.4064	8	8	0.435	21		Welch-corrected t, df	t=4.510, df=11.97
Veh vs. Gli1+	1.75	4.75	-3	0.4064	8	8	10.44	21
Gli1- vs. Gli1+	1.875	4.75	-2.875	0.4064	8	8	10	21		How big is the difference?
										Mean of column A	2
										Mean of column B	4.857
										Difference between means (B - A) ± SEM	2.857 ± 0.6335
										95% confidence interval	1.476 to 4.238
										R squared (eta squared)	0.6295
										F test to compare variances
										F, DFn, Dfd	1.107, 6, 6
										P value	0.9048
										P value summary	ns
										Significantly different (P < 0.05)?	No
										Data analyzed
										Sample size, column A	7
										Sample size, column B	7
