# Supplementary material for: The critical role of Hedgehog-responsive mesenchymal progenitors in meniscus development and injury repair
Source: eLife. 2021 Jun 4;10:e62917. doi: 10.7554/eLife.62917 (PMC8177886; doi:10.7554/eLife.62917)
Supplement: Figure 6—source data 1. [file elife-62917-fig6-data1.xlsx]

## Sheet: Sheet1
Fig. 6C										Fig. 6B	Uncal. Th.									Fig. 6B	Cal. Th.
				Sham										Sham										Sham
Veh	0	3	2	1	1	0	0	1		Veh	67	75	47	65	75	49	43	79		Veh	57	39	43	81	29	34	59	43
Gli1+	1	1	2	0	0	3	3	1		Gli1+	83	72	43	56	65	62	72	61		Gli1+	71	45	28	54	66	74	23	45
PMA	0	0	3	1	2	0	1	1		PMA	83	40	57	65	69	48	51	47		PMA	71	87	75	31	23	36	63	51
				Injury										Injury										Injury
Veh	9	6	7	5	6	8	9	5		Veh	21	19	23	15	34	40	26	14		Veh	39	69	26	76	39	28	36	45
Gli1+	4	7	4	2	7	3	5	4		Gli1+	49	71	52	45	38	65	71	41		Gli1+	76	21	34	71	71	34	41	39
PMA	3	2	5	2	3	4	3	4		PMA	77	69	45	53	41	56	63	43		PMA	82	59	25	47	39	66	61	35
Compare cell means regardless of rows and columns										Compare cell means regardless of rows and columns										Compare cell means regardless of rows and columns
Number of families	1									Number of families	1									Number of families	1
Number of comparisons per family	15									Number of comparisons per family	15									Number of comparisons per family	15
Alpha	0.05									Alpha	0.05									Alpha	0.05
Tukey's multiple comparisons test	Mean Diff.	95.00% CI of diff.	Significant?	Summary	Adjusted P Value					Tukey's multiple comparisons test	Mean Diff.	95.00% CI of diff.	Significant?	Summary	Adjusted P Value					Tukey's multiple comparisons test	Mean Diff.	95.00% CI of diff.	Significant?	Summary	Adjusted P Value
Veh:Sham vs. Veh:Injury	-5.875	-7.860 to -3.890	Yes	****	<0.0001					Veh:Sham vs. Veh:Injury	38.5	19.50 to 57.50	Yes	****	<0.0001					Veh:Sham vs. Veh:Injury	3.375	-25.86 to 32.61	No	ns	0.9993
Veh:Sham vs. Gli1+:Sham	-0.375	-2.360 to 1.610	No	ns	0.9928					Veh:Sham vs. Gli1+:Sham	-1.75	-20.75 to 17.25	No	ns	0.9998					Veh:Sham vs. Gli1+:Sham	-2.625	-31.86 to 26.61	No	ns	0.9998
Veh:Sham vs. Gli1+:Injury	-3.5	-5.485 to -1.515	Yes	****	<0.0001					Veh:Sham vs. Gli1+:Injury	8.5	-10.50 to 27.50	No	ns	0.7637					Veh:Sham vs. Gli1+:Injury	-0.25	-29.49 to 28.99	No	ns	>0.9999
Veh:Sham vs. PMA:Sham	0	-1.985 to 1.985	No	ns	>0.9999					Veh:Sham vs. PMA:Sham	5	-14.00 to 24.00	No	ns	0.9685					Veh:Sham vs. PMA:Sham	-6.5	-35.74 to 22.74	No	ns	0.985
Veh:Sham vs. PMA:Injury	-2.25	-4.235 to -0.2654	Yes	*	0.0181					Veh:Sham vs. PMA:Injury	6.625	-12.37 to 25.62	No	ns	0.9012					Veh:Sham vs. PMA:Injury	-3.625	-32.86 to 25.61	No	ns	0.999
Veh:Injury vs. Gli1+:Sham	5.5	3.515 to 7.485	Yes	****	<0.0001					Veh:Injury vs. Gli1+:Sham	-40.25	-59.25 to -21.25	Yes	****	<0.0001					Veh:Injury vs. Gli1+:Sham	-6	-35.24 to 23.24	No	ns	0.9895
Veh:Injury vs. Gli1+:Injury	2.375	0.3904 to 4.360	Yes	*	0.0109					Veh:Injury vs. Gli1+:Injury	-30	-49.00 to -11.00	Yes	***	0.0004					Veh:Injury vs. Gli1+:Injury	-3.625	-32.86 to 25.61	No	ns	0.999
Veh:Injury vs. PMA:Sham	5.875	3.890 to 7.860	Yes	****	<0.0001					Veh:Injury vs. PMA:Sham	-33.5	-52.50 to -14.50	Yes	****	<0.0001					Veh:Injury vs. PMA:Sham	-9.875	-39.11 to 19.36	No	ns	0.9126
Veh:Injury vs. PMA:Injury	3.625	1.640 to 5.610	Yes	****	<0.0001					Veh:Injury vs. PMA:Injury	-31.88	-50.87 to -12.88	Yes	***	0.0001					Veh:Injury vs. PMA:Injury	-7	-36.24 to 22.24	No	ns	0.9791
Gli1+:Sham vs. Gli1+:Injury	-3.125	-5.110 to -1.140	Yes	***	0.0004					Gli1+:Sham vs. Gli1+:Injury	10.25	-8.746 to 29.25	No	ns	0.5962					Gli1+:Sham vs. Gli1+:Injury	2.375	-26.86 to 31.61	No	ns	0.9999
Gli1+:Sham vs. PMA:Sham	0.375	-1.610 to 2.360	No	ns	0.9928					Gli1+:Sham vs. PMA:Sham	6.75	-12.25 to 25.75	No	ns	0.8939					Gli1+:Sham vs. PMA:Sham	-3.875	-33.11 to 25.36	No	ns	0.9987
Gli1+:Sham vs. PMA:Injury	-1.875	-3.860 to 0.1096	No	ns	0.0737					Gli1+:Sham vs. PMA:Injury	8.375	-10.62 to 27.37	No	ns	0.7745					Gli1+:Sham vs. PMA:Injury	-1	-30.24 to 28.24	No	ns	>0.9999
Gli1+:Injury vs. PMA:Sham	3.5	1.515 to 5.485	Yes	****	<0.0001					Gli1+:Injury vs. PMA:Sham	-3.5	-22.50 to 15.50	No	ns	0.9936					Gli1+:Injury vs. PMA:Sham	-6.25	-35.49 to 22.99	No	ns	0.9874
Gli1+:Injury vs. PMA:Injury	1.25	-0.7346 to 3.235	No	ns	0.428					Gli1+:Injury vs. PMA:Injury	-1.875	-20.87 to 17.12	No	ns	0.9997					Gli1+:Injury vs. PMA:Injury	-3.375	-32.61 to 25.86	No	ns	0.9993
PMA:Sham vs. PMA:Injury	-2.25	-4.235 to -0.2654	Yes	*	0.0181					PMA:Sham vs. PMA:Injury	1.625	-17.37 to 20.62	No	ns	0.9998					PMA:Sham vs. PMA:Injury	2.875	-26.36 to 32.11	No	ns	0.9997
Test details	Mean 1	Mean 2	Mean Diff.	SE of diff.	N1	N2	q	DF		Test details	Mean 1	Mean 2	Mean Diff.	SE of diff.	N1	N2	q	DF		Test details	Mean 1	Mean 2	Mean Diff.	SE of diff.	N1	N2	q	DF
Veh:Sham vs. Veh:Injury	1	6.875	-5.875	0.6648	8	8	12.5	42		Veh:Sham vs. Veh:Injury	62.5	24	38.5	6.363	8	8	8.557	42		Veh:Sham vs. Veh:Injury	48.13	44.75	3.375	9.794	8	8	0.4873	42
Veh:Sham vs. Gli1+:Sham	1	1.375	-0.375	0.6648	8	8	0.7977	42		Veh:Sham vs. Gli1+:Sham	62.5	64.25	-1.75	6.363	8	8	0.3889	42		Veh:Sham vs. Gli1+:Sham	48.13	50.75	-2.625	9.794	8	8	0.379	42
Veh:Sham vs. Gli1+:Injury	1	4.5	-3.5	0.6648	8	8	7.445	42		Veh:Sham vs. Gli1+:Injury	62.5	54	8.5	6.363	8	8	1.889	42		Veh:Sham vs. Gli1+:Injury	48.13	48.38	-0.25	9.794	8	8	0.0361	42
Veh:Sham vs. PMA:Sham	1	1	0	0.6648	8	8	0	42		Veh:Sham vs. PMA:Sham	62.5	57.5	5	6.363	8	8	1.111	42		Veh:Sham vs. PMA:Sham	48.13	54.63	-6.5	9.794	8	8	0.9386	42
Veh:Sham vs. PMA:Injury	1	3.25	-2.25	0.6648	8	8	4.786	42		Veh:Sham vs. PMA:Injury	62.5	55.88	6.625	6.363	8	8	1.472	42		Veh:Sham vs. PMA:Injury	48.13	51.75	-3.625	9.794	8	8	0.5234	42
Veh:Injury vs. Gli1+:Sham	6.875	1.375	5.5	0.6648	8	8	11.7	42		Veh:Injury vs. Gli1+:Sham	24	64.25	-40.25	6.363	8	8	8.946	42		Veh:Injury vs. Gli1+:Sham	44.75	50.75	-6	9.794	8	8	0.8664	42
Veh:Injury vs. Gli1+:Injury	6.875	4.5	2.375	0.6648	8	8	5.052	42		Veh:Injury vs. Gli1+:Injury	24	54	-30	6.363	8	8	6.667	42		Veh:Injury vs. Gli1+:Injury	44.75	48.38	-3.625	9.794	8	8	0.5234	42
Veh:Injury vs. PMA:Sham	6.875	1	5.875	0.6648	8	8	12.5	42		Veh:Injury vs. PMA:Sham	24	57.5	-33.5	6.363	8	8	7.445	42		Veh:Injury vs. PMA:Sham	44.75	54.63	-9.875	9.794	8	8	1.426	42
Veh:Injury vs. PMA:Injury	6.875	3.25	3.625	0.6648	8	8	7.711	42		Veh:Injury vs. PMA:Injury	24	55.88	-31.88	6.363	8	8	7.084	42		Veh:Injury vs. PMA:Injury	44.75	51.75	-7	9.794	8	8	1.011	42
Gli1+:Sham vs. Gli1+:Injury	1.375	4.5	-3.125	0.6648	8	8	6.648	42		Gli1+:Sham vs. Gli1+:Injury	64.25	54	10.25	6.363	8	8	2.278	42		Gli1+:Sham vs. Gli1+:Injury	50.75	48.38	2.375	9.794	8	8	0.3429	42
Gli1+:Sham vs. PMA:Sham	1.375	1	0.375	0.6648	8	8	0.7977	42		Gli1+:Sham vs. PMA:Sham	64.25	57.5	6.75	6.363	8	8	1.5	42		Gli1+:Sham vs. PMA:Sham	50.75	54.63	-3.875	9.794	8	8	0.5595	42
Gli1+:Sham vs. PMA:Injury	1.375	3.25	-1.875	0.6648	8	8	3.989	42		Gli1+:Sham vs. PMA:Injury	64.25	55.88	8.375	6.363	8	8	1.861	42		Gli1+:Sham vs. PMA:Injury	50.75	51.75	-1	9.794	8	8	0.1444	42
Gli1+:Injury vs. PMA:Sham	4.5	1	3.5	0.6648	8	8	7.445	42		Gli1+:Injury vs. PMA:Sham	54	57.5	-3.5	6.363	8	8	0.7779	42		Gli1+:Injury vs. PMA:Sham	48.38	54.63	-6.25	9.794	8	8	0.9025	42
Gli1+:Injury vs. PMA:Injury	4.5	3.25	1.25	0.6648	8	8	2.659	42		Gli1+:Injury vs. PMA:Injury	54	55.88	-1.875	6.363	8	8	0.4167	42		Gli1+:Injury vs. PMA:Injury	48.38	51.75	-3.375	9.794	8	8	0.4873	42
PMA:Sham vs. PMA:Injury	1	3.25	-2.25	0.6648	8	8	4.786	42		PMA:Sham vs. PMA:Injury	57.5	55.88	1.625	6.363	8	8	0.3612	42		PMA:Sham vs. PMA:Injury	54.63	51.75	2.875	9.794	8	8	0.4151	42
Fig. 6D										Fig. 6F
			Sham											Sham
Veh	1.602	0.992	1.213	1.059	2.078					Veh	1	2	2	3	0	0	2
Gli1+	1.602	0.803	2.078	0.96	0.803					PMA	1	1	3	2	2	0	2
PMA	2.078	0.803	0.929	2.078	0.613									DMM
			Injury							Veh	8	4	4	7	6	7	4
Veh	0.445	0.215	0.345	0.465	0.332					PMA	8	7	7	4	5	6	6
Gli1+	0.761	2.078	1.075	1.059	0.992
PMA	0.992	0.761	1.059	2.078	0.761					Compare cell means regardless of rows and columns
Compare cell means regardless of rows and columns										Number of families	1
										Number of comparisons per family	6
Number of families	1									Alpha	0.05
Number of comparisons per family	15
Alpha	0.05									Tukey's multiple comparisons test	Mean Diff.	95.00% CI of diff.	Significant?	Summary	Adjusted P Value
Tukey's multiple comparisons test	Mean Diff.	95.00% CI of diff.	Significant?	Summary	Adjusted P Value					Veh:Sham vs. Veh:DMM	-4.286	-6.230 to -2.342	Yes	****	<0.0001
										Veh:Sham vs. PMA:Sham	-0.1429	-2.087 to 1.801	No	ns	0.997
Veh:Sham vs. Veh:Injury	1.028	0.01421 to 2.043	Yes	*	0.0455					Veh:Sham vs. PMA:DMM	-4.714	-6.658 to -2.770	Yes	****	<0.0001
Veh:Sham vs. Gli1+:Sham	0.1396	-0.8746 to 1.154	No	ns	0.998					Veh:DMM vs. PMA:Sham	4.143	2.199 to 6.087	Yes	****	<0.0001
Veh:Sham vs. Gli1+:Injury	0.1958	-0.8184 to 1.210	No	ns	0.9903					Veh:DMM vs. PMA:DMM	-0.4286	-2.373 to 1.515	No	ns	0.9285
Veh:Sham vs. PMA:Sham	0.0886	-0.9256 to 1.103	No	ns	0.9998					PMA:Sham vs. PMA:DMM	-4.571	-6.515 to -2.627	Yes	****	<0.0001
Veh:Sham vs. PMA:Injury	0.2586	-0.7556 to 1.273	No	ns	0.9669
Veh:Injury vs. Gli1+:Sham	-0.8888	-1.903 to 0.1254	No	ns	0.11
Veh:Injury vs. Gli1+:Injury	-0.8326	-1.847 to 0.1816	No	ns	0.1525					Test details	Mean 1	Mean 2	Mean Diff.	SE of diff.	N1	N2	q	DF
Veh:Injury vs. PMA:Sham	-0.9398	-1.954 to 0.07439	No	ns	0.0805
Veh:Injury vs. PMA:Injury	-0.7698	-1.784 to 0.2444	No	ns	0.2148					Veh:Sham vs. Veh:DMM	1.429	5.714	-4.286	0.7047	7	7	8.601	24
Gli1+:Sham vs. Gli1+:Injury	0.0562	-0.9580 to 1.070	No	ns	>0.9999					Veh:Sham vs. PMA:Sham	1.429	1.571	-0.1429	0.7047	7	7	0.2867	24
Gli1+:Sham vs. PMA:Sham	-0.051	-1.065 to 0.9632	No	ns	>0.9999					Veh:Sham vs. PMA:DMM	1.429	6.143	-4.714	0.7047	7	7	9.461	24
Gli1+:Sham vs. PMA:Injury	0.119	-0.8952 to 1.133	No	ns	0.9991					Veh:DMM vs. PMA:Sham	5.714	1.571	4.143	0.7047	7	7	8.314	24
Gli1+:Injury vs. PMA:Sham	-0.1072	-1.121 to 0.9070	No	ns	0.9994					Veh:DMM vs. PMA:DMM	5.714	6.143	-0.4286	0.7047	7	7	0.8601	24
Gli1+:Injury vs. PMA:Injury	0.0628	-0.9514 to 1.077	No	ns	>0.9999					PMA:Sham vs. PMA:DMM	1.571	6.143	-4.571	0.7047	7	7	9.174	24
PMA:Sham vs. PMA:Injury	0.17	-0.8442 to 1.184	No	ns	0.9949
Test details	Mean 1	Mean 2	Mean Diff.	SE of diff.	N1	N2	q	DF
Veh:Sham vs. Veh:Injury	1.389	0.3604	1.028	0.328	5	5	4.434	24
Veh:Sham vs. Gli1+:Sham	1.389	1.249	0.1396	0.328	5	5	0.6019	24
Veh:Sham vs. Gli1+:Injury	1.389	1.193	0.1958	0.328	5	5	0.8442	24
Veh:Sham vs. PMA:Sham	1.389	1.3	0.0886	0.328	5	5	0.382	24
Veh:Sham vs. PMA:Injury	1.389	1.13	0.2586	0.328	5	5	1.115	24
Veh:Injury vs. Gli1+:Sham	0.3604	1.249	-0.8888	0.328	5	5	3.832	24
Veh:Injury vs. Gli1+:Injury	0.3604	1.193	-0.8326	0.328	5	5	3.59	24
Veh:Injury vs. PMA:Sham	0.3604	1.3	-0.9398	0.328	5	5	4.052	24
Veh:Injury vs. PMA:Injury	0.3604	1.13	-0.7698	0.328	5	5	3.319	24
Gli1+:Sham vs. Gli1+:Injury	1.249	1.193	0.0562	0.328	5	5	0.2423	24
Gli1+:Sham vs. PMA:Sham	1.249	1.3	-0.051	0.328	5	5	0.2199	24
Gli1+:Sham vs. PMA:Injury	1.249	1.13	0.119	0.328	5	5	0.5131	24
Gli1+:Injury vs. PMA:Sham	1.193	1.3	-0.1072	0.328	5	5	0.4622	24
Gli1+:Injury vs. PMA:Injury	1.193	1.13	0.0628	0.328	5	5	0.2708	24
PMA:Sham vs. PMA:Injury	1.3	1.13	0.17	0.328	5	5	0.733	24
